1 **Comparison of electrophysiological left bundle branch pacing characteristics in**  
2 **different bilateral electrode pacing vector configurations**

3 Hao Wu, MD <sup>a</sup>, Longfu Jiang, MD <sup>a, b</sup>, Jiabo Shen, MD <sup>a</sup>, Lu Zhang, MD <sup>a</sup>

4 <sup>a</sup>Department of Cardiovascular Medicine, Ningbo NO.2 Hospital, Ningbo City, Zhejiang  
5 province, China, 315000

6 <sup>b</sup>Cardiovascular Disease Clinical Medical Research Center of Ningbo, Zhejiang, China,  
7 315000

8

9 **Corresponding author:**

10 Longfu Jiang, MD, Professor

11 Department of Cardiovascular Medicine, Ningbo NO.2 Hospital, Ningbo City, Zhejiang  
12 province, China.

13 Cardiovascular Disease Clinical Medical Research Center of Ningbo, Zhejiang, China.

14 Address: NO.41, Northwest Street, Haishu District, Ningbo City, Zhejiang Province, China.

15 Email: [longfujianghwamei@163.com](mailto:longfujianghwamei@163.com)

16 **Running Title:** Electrophysiological characteristic of LBB pacing

17

18 **Conflict of interest statement:** we declare that we do not have any commercial or  
19 associative interest that represents a conflict of interest in connection with the work  
20 submitted.

21

22 **Funding sources:**

NOTE: This preprint reports new research that has not been certified by peer review and should not be used to guide clinical practice.

23 This work was supported by the Zhejiang Provincial Public Service and Application Research  
24 Foundation, China [grant number LGF22H020009], the Ningbo Health Branding Subject  
25 Fund [grant number PPXK2018-01] and Medical Scientific Research Foundation of Zhejiang  
26 Province, China [grant number 2022KY1122].

27

28

## 29 **Abstract**

30 **Background:** Left bundle branch pacing (LBBP) in bipolar pacing produces a more balanced  
31 ventricular activation than conventional unipolar pacing but need high pacing output. The  
32 present study aimed to compare the electrophysiological characteristics of LBBP in different  
33 bilateral electrode pacing vector configurations.

34 **Methods:** A total of 57 patients who met the criteria for left bundle branch (LBB) capture and  
35 underwent three bilateral electrode pacing vector configuration test were enrolled. The  
36 electrocardiogram (ECG) and electrogram (EGM) parameters were evaluated and other  
37 electrophysiological characteristics were analyzed using a three-electrode configuration test.

38 **Results:** Seven capture modes (right ventricular septal (RVS) + left ventricular septal (LVS)  
39 + LBB, RVS + LBB, LVS + LBB, RVS + LVS, RVS, LVS, and LBB) were utilized in the  
40 study. The thresholds of full fusion mode (RVS+LVS+LB) in Bilateral Cathodes and Ring  
41 Bipolar were all lower than that in Tip Bipolar ( $1.2 \pm 0.5$  V vs.  $2.7 \pm 1.0$  V,  $P < 0.001$ ;  $1.6 \pm$   
42  $0.6$  V vs.  $2.7 \pm 1.0$  V,  $P < 0.001$ ). Full fusion mode had the shortest P-QRS ( $116.9 \pm 12.8$  ms),  
43 V6 RWPT ( $64.9 \pm 9.7$  ms), and V1 RWPT ( $94.5 \pm 12.3$  ms).

44 **Conclusion:** Changing the bilateral electrode pacing vector configuration to Bilateral

45 Cathodes and Ring Bipolar can reduce the full fusion mode capture threshold compared to  
46 conventional bipolar pacing.

47 **Keywords:** Bipolar pacing; Conduction system pacing; Capture threshold; Electrode  
48 configuration; Left bundle branch pacing

49

## 50 **What is Known?**

51 1. Left bundle branch pacing in bipolar pacing can capture left bundle branch, left ventricular  
52 septal myocardial, and right ventricular septal myocardial at a higher pacing output, which  
53 was termed full fusion mode.

## 54 **What the Study Adds?**

55 1. This study indicates that the full fusion mode threshold can be reduced by changing the  
56 pacing vector configuration.  
57 2. Seven capture modes were observed in Ring Bipolar and Bilateral Cathodes during  
58 threshold testing.

59

## 60 **Introduction**

61 Conventional right ventricular (RV) pacing is a standard treatment for patients with  
62 symptomatic bradyarrhythmia, but it is associated with the risk of heart failure due to  
63 electrical and mechanical dyssynchrony.<sup>1,2</sup> His bundle pacing (HBP) is a more physiological  
64 pacing modality with an improvement in exercise capacity and left ventricular (LV) ejection  
65 fraction.<sup>3,4</sup> However, it also has limitations, including longer procedure times and high and  
66 sometimes unstable pacing capture threshold.<sup>5,6</sup> Recently, left bundle branch pacing (LBBP)

67 has emerged as another conduction system pacing modality with a low and stable threshold  
68 compared to HBP.<sup>7-10</sup> LBBP produces a fast LV activation, but the presence of a right bundle  
69 branch block (RBBB) or even incomplete RBBB morphology remains a concern for  
70 interventricular dyssynchrony.<sup>11</sup>

71 We have discovered that LBBP in bipolar pacing can capture left bundle branch (LBB),  
72 left ventricular septal (LVS) myocardial, and right ventricular septal (RVS) myocardial at a  
73 higher pacing output when the lead tip is placed in the left septal subendocardial area and the  
74 ring electrode is in contact with the right septal endocardium,<sup>12</sup> which was termed full fusion  
75 mode. This mode results in a more balanced ventricular activation than conventional unipolar  
76 pacing in LBBP.<sup>13</sup> However, the full fusion mode capture threshold was high in bipolar  
77 pacing because the RVS capture threshold in bipolar pacing was much higher than that in  
78 unipolar pacing. Different RVS thresholds were likely the result of capture by either the  
79 cathode or anode. Therefore, the effect of changing the bilateral electrode pacing vectors,  
80 such as using the tip electrode as the anode or both the tip and ring electrodes as the cathodes,  
81 was investigated. The present study sought to compare the electrophysiological  
82 characteristics of LBBP in different bilateral electrode pacing vector configurations.

## 83 **Methods**

### 84 *Patient population and implantation procedure*

85 Prospective consecutive enrolled patients referred for LBBP between March 2022 and  
86 November 2022 at the Ningbo No. 2 Hospital were evaluated in the present study. The study  
87 protocol was approved by the hospital institutional review board  
88 (SL-KYSB-NBEY-2021-079-01), and all patients provided written informed consent.

89 A SelectSecure™ lead (model 3830, 69 cm, Medtronic Inc., Minneapolis, MN, USA)  
90 and a fixed-curve sheath (C315 HIS, Medtronic, Minneapolis, MN) were used during the lead  
91 implant procedure. The continuous LBBP pacing technique was utilized as described  
92 previously.<sup>14-16</sup> Patients with direct evidence of LBB capture obtained during dynamic  
93 electrocardiogram (ECG) maneuvers as a demonstration of non-selective LBB to selective  
94 LBB capture or non-selective LBB to septal capture transition during unipolar pacing  
95 threshold testing were included in the study to ensure data accuracy.

96 Patients who had already undergone LBBP and three bilateral electrode pacing vector  
97 configuration testing, which was not yet a conventional procedure before March 2022, were  
98 retrospectively enrolled to increase the study sample size.

#### 99 ***Multiple bilateral electrode pacing vector configuration testing***

100 Three different bilateral electrode pacing vector configurations were tested during the  
101 threshold test (Figure 1): (1) tip electrode as the cathode and ring electrode as the anode (Tip  
102 Bipolar); (2) tip electrode as the anode and ring electrode as the cathode (Ring Bipolar); and  
103 (3) both tip and ring electrodes as the cathodes (Bilateral Cathodes). There were predictable  
104 and consistent ECG and electrogram (EGM) morphology changes during the threshold test of  
105 three different bilateral electrode pacing vector configurations (Figures 2 and 3).

#### 106 ***Evaluation of ECG and EGM parameters***

107 Our previous study distinguished four capture modes during a conventional bipolar pacing  
108 threshold test based on the changes in ECG and left bundle (LB) lead EGM.<sup>12</sup> When the  
109 pacing output was reduced, LB lead EGM separation (a complex mixed wave changed to two  
110 connected individual waves) indicated one-sided ventricular myocardial loss capture. Losing

111 the RVS capture prolonged the V1 RWPT (stimulus–peak of the R wave). Losing the LBB  
112 capture prolonged the V6 RWPT or resulted in an isoelectric interval between the pacing  
113 artifact and local ventricular EGM in selected LBB captures. Seven different capture modes  
114 can be distinguished based on this theory according to the changes in EGM and ECG during  
115 the threshold test of the three bilateral electrode pacing vector configurations (Supplementary  
116 Figure 1, Figures 2 and 3). These were: A) full fusion mode, capture RVS + LVS + LBB; B)  
117 semi fusion mode, included three capture modes, RVS + LBB, LVS + LBB, and RVS + LVS;  
118 and C) select capture mode, also included three capture modes, RVS, LVS, and LBB.

### 119 *Data collection*

120 Baseline patient characteristics and indications for pacing were recorded in addition to  
121 echocardiographic data and baseline QRS duration. Implantation and threshold test  
122 procedures were recorded on a digital electrophysiological system (Abbott Laboratories,  
123 Chicago, IL). To ensure high precision, the measurements were performed using all 12  
124 surface ECG leads recorded simultaneously, digital calipers, fast sweep speed (200–600  
125 mm/s), and appropriate signal augmentation. At least three QRS complexes were measured  
126 and their values were averaged. Paced QRS (P-QRS) duration was calculated based on the  
127 pacing stimulus and the final QRS component in any of the 12 ECG leads. The presence of  
128 LBB potential and LBB potential-final QRS component duration (LB-QRS) were also  
129 recorded.

130 The characteristics of various changes in ECG and EGM morphology in three different  
131 bilateral electrode pacing vector configuration testing and the thresholds of seven capture  
132 modes were documented. The RWPT in surface leads V6\V1 (paced ECG morphology of V1

133 lead in RVS capture mode presented as QS type, so it had no V1 RWPT in RVS capture mode)  
134 and P-QRS of seven capture modes were determined.

### 135 *Statistical analysis*

136 Continuous variables were reported as mean  $\pm$  standard deviation. Categorical variables were  
137 expressed as percentages. Paired comparisons were made using the student t-test if the data  
138 were normally distributed. ANOVA was used for comparing more than two groups in  
139 repeated measurements, while LSD post hoc test was used for two-group comparisons. A  
140 p-value of  $<0.05$  was considered statistically significant. Statistical analysis was performed  
141 using IBM SPSS Statistics for Macintosh (version 26.0, IBM Corp, Armonk, NY, USA).

## 142 **Results**

### 143 *Population*

144 A total of 72 patients underwent the LBBP procedure. Of these, 56 cases had clear dynamic  
145 ECG maneuvers during the unipolar pacing threshold test, and 53 patients underwent three  
146 different bilateral electrode pacing vector configuration testing. Four patients who have  
147 undergone three different bilateral electrode pacing vector configuration testing before March  
148 2022 were retrospectively enrolled. A total of 57 cases were enrolled in the study. The  
149 primary clinical and procedure-related characteristics of the included patients are presented in  
150 Tables 1 and 2. The unipolar pacing threshold test showed the S-LB threshold captured by the  
151 tip electrode to be  $0.5 \pm 0.2$  V, the LVS threshold captured by the tip electrode to be  $0.6 \pm 0.1$   
152 V, and the RVS threshold captured by the Ring electrode to be  $0.9 \pm 0.5$  V.

### 153 *Transitions of seven capture modes during three bilateral electrode pacing vector*

### 154 *configuration testing*

155 The distribution of seven capture modes during three different bilateral electrode pacing  
156 vector configuration testing is shown in Figure 1. The transition of seven capture modes  
157 during three different bilateral electrode pacing vector configuration testing is shown in  
158 Figures 2 and 3.

159 The full fusion mode (RVS+LVS+LBB) was achieved in Tip Bipolar, Ring Bipolar, and  
160 Bilateral Cathodes with a higher pacing output in all 57 patients. LBB and LVS were  
161 captured using the tip side and RVS was captured using the ring side, which presented as “QS,  
162 Qr, or QR” pattern in lead V1, a complex mixed wave in LB lead EGM, short V1\V6 RWPT,  
163 and narrow P-QRS.

164 There are two types of transition in the Tip Bipolar configuration (conventional bipolar  
165 pacing) that were previously described.<sup>12</sup> Therefore, the detailed changes in ECG and EGM  
166 are not discussed in this paper. A loss of RVS capture resulted in LBB+LVS capture mode in  
167 all 57 patients as the output decreased. A change to selected LBB capture in 42 patients and  
168 LVS capture in 15 patients occurred as the output was reduced further.

169 In the Ring Bipolar configuration mode, only 14 patients changed to LVS+LBB capture  
170 as the output was reduced. A total of 33 patients changed to RVS+LBB capture (EGM  
171 separated and ECG remained the same as full fusion mode), and 10 patients changed to  
172 LVS+RVS capture (V6 RWPT suddenly prolonged and EGM remained almost the same as  
173 full fusion mode). Furthermore, 39 patients changed to selected LBB capture, three patients  
174 changed to LVS capture, and 15 patients changed to RVS capture (V6 RWPT further  
175 prolonged) when the output was reduced further.



176 In the Bilateral Cathodes mode, a similar transition of capture modes as that in the Ring  
177 Bipolar configuration mode was observed during the threshold test. A total of 27 patients  
178 changed to LVS+LBB capture, 20 patients changed to RVS+LBB capture, and 10 patients  
179 changed to RVS+LVS capture. As the output was reduced further, 39 patients changed to  
180 LBB capture, 10 patients changed to LVS capture, and eight patients changed to RVS capture.

181 ***Ventricular sensing, impedance, and threshold of seven capture modes in three bilateral***  
182 ***electrode pacing vector configurations***

183 Bilateral Cathodes mode had the lowest ventricular sensing and impedance ( $7.0 \pm 4.3$  mV;  
184  $421.4 \pm 83.5$   $\Omega$ ; Figure 4). Full fusion mode thresholds in Bilateral Cathodes and Ring  
185 Bipolar were all lower than that in Tip Bipolar ( $1.2 \pm 0.5$  V vs.  $2.7 \pm 1.0$  V,  $P < 0.001$ ;  $1.6 \pm$   
186  $0.6$  V vs.  $2.7 \pm 1.0$  V,  $P < 0.001$ ). The threshold of LVS+LBB capture mode in Ring Bipolar  
187 mode was much higher than that in Tip Bipolar ( $1.1 \pm 0.5$  V vs.  $0.7 \pm 0.2$  V,  $P < 0.001$ ). The  
188 select LBB and LVS capture threshold in Ring Bipolar mode was much higher than that in  
189 Tip Bipolar ( $0.7 \pm 0.2$  V vs.  $0.4 \pm 0.2$  V,  $P < 0.001$ ;  $1.0 \pm 0.2$  V vs.  $0.6 \pm 0.2$  V,  $P < 0.001$ ).  
190 There was no patient with RVS+LBB and LVS+RVS capture mode in Tip Bipolar.

191 ***P-QRS in seven capture modes***

192 Full fusion mode had a similar P-QRS compared to that in RVS+LBB mode ( $116.9 \pm 12.8$  ms  
193 vs.  $122.1 \pm 13.5$  ms), but was shorter compared to those of other modes (Figure 5). The  
194 P-QRS of select RVS capture mode was the longest ( $143.1 \pm 20.9$  ms).

195 ***V6 RWPT in seven capture modes***

196 Full fusion mode, LVS+LBB, RVS+LBB, and select LBB capture mode all had a short V6  
197 RWPT and there were no significant differences among them ( $64.9 \pm 9.7$  ms vs.  $65.7 \pm 9.1$

198 ms vs.  $68.6 \pm 12.5$  ms vs.  $62.8 \pm 6.9$  ms; Figure 5). Select RVS capture mode demonstrated a  
199 longer V6 RWPT than select LVS capture mode ( $100.1 \pm 13.9$  ms vs.  $81.6 \pm 10.1$  ms,  $P <$   
200 0.001).

### 201 *V1 RWPT in seven capture modes*

202 Full fusion mode and RVS+LBB capture mode all showed the shortest V1 RWPT ( $94.5 \pm$   
203  $12.3$  ms vs.  $94.0 \pm 23.6$  ms; Figure 5). LVS capture and select LBB capture mode had the  
204 longest V1 RWPT ( $114.4 \pm 16.8$  ms vs.  $113.9 \pm 16.7$  ms).

### 205 *Full fusion mode in patients with native narrow and wide QRS*

206 Full fusion mode was compared in subgroups of patients with a native narrow and wide QRS.  
207 A total of 40 patients had a native narrow QRS, and 17 patients had a native wide QRS  
208 (Figure 6). The P-QRS duration of full fusion mode was almost as short as the LB-QRS  
209 duration in intrinsic rhythm in patients with native narrow QRS ( $118.5 \pm 10.8$  ms vs.  $112.8 \pm$   
210  $17.5$  ms,  $P = 0.1$ ). In patients with native wide QRS, the P-QRS duration of full fusion mode  
211 showed a statistically significant difference to the LB-QRS duration in intrinsic rhythm  
212 ( $120.1 \pm 14.5$  ms vs.  $149.6 \pm 19.7$  ms,  $P < 0.05$ ).

### 213 **Discussion**

214 The main findings of the present study were as follows: (1) Three bilateral electrode pacing  
215 vector configurations can all achieve full fusion mode but with different capture thresholds.  
216 Bilateral Cathodes had the lowest threshold in full fusion mode, and Tip Bipolar had the  
217 highest threshold in full fusion mode. (2) Seven capture modes were observed in Ring  
218 Bipolar and Bilateral Cathodes during threshold testing, including full fusion mode  
219 (RVS+LVSP+LBB), semi fusion mode (LVS+LBB, RVS+LBB, and RVS+LVS), and select

220 capture mode (LBB, LVS, and RVS). (3) Full fusion mode had the shortest P-QRS, V6 RWPT,  
221 and V1 RWPT. It achieved a short P-QRS in both narrow and wide native QRS types.

222 *Different full fusion mode thresholds in three bilateral electrode pacing vector*  
223 *configurations*

224 The present study results showed that Bilateral Cathodes had the lowest threshold in full  
225 fusion mode ( $1.2 \pm 0.5$  V), while Tip Bipolar had the highest ( $2.7 \pm 1.0$  V). This indicates that  
226 the full fusion mode threshold can be reduced by changing the pacing vector configuration.

227 Cathodal stimulation of the cardiac septal myocardium occurs as a negative charge is applied  
228 to the myocardial–lead interface, which can direct cell depolarization in the region under the  
229 electrode and usually has a low capture threshold. On the contrary, anodal stimulation results  
230 in the accumulation of negatively charged ions at the myocardial–lead interface, which  
231 hyperpolarizes adjacent cells, so that the ability to trigger an action potential is paradoxical.

232 However, anodal capture is routinely observed in cardiac pacing and usually requires a high  
233 pacing output, which can be explained by the bidomain cardiac tissue model that proposes to  
234 induce virtual cathodes at sites distant from the electrode to initiate depolarization.<sup>17–19</sup>

235 Therefore, the myocardium capture threshold depends on whether it is stimulated by the  
236 anode or cathode. Since the RVS capture threshold was higher than that of LVS and LBB in  
237 unipolar cathodal stimulation (Table 2), and the myocardial RVS capture by anodal  
238 stimulation in Tip Bipolar resulted in a further decrease in RVS myocardial capture threshold,  
239 the full fusion mode capture threshold was the highest. In Bilateral Cathodes configuration,  
240 all of the LBB\LVS and RVS were captured by cathodal stimulation, so the full fusion mode  
241 capture threshold was the lowest. In Ring Bipolar configuration, the LVS and LBB capture

242 threshold increased as they were captured by anodal stimulation, but the full fusion mode  
243 capture threshold was still lower than that in Tip Bipolar configuration. The LVS and LBB  
244 capture threshold was lower than that of RVS in unipolar cathodal. In addition, the full fusion  
245 mode threshold was much more affected by the Tip Bipolar configuration than the Ring  
246 Bipolar configuration, likely because the tip electrodes had different surrounding ventricular  
247 myocardial areas with completely different morphology from those of the ring electrodes.

### 248 *Three new capture modes in Ring Bipolar and Bilateral Cathodes configurations*

249 Only four capture modes were observed in conventional bipolar pacing mode (Tip Bipolar  
250 configuration), including full fusion mode (LVS+RVS+LBB), LVS+LBB, LBB, and LVS.  
251 Three new capture modes in Ring Bipolar and Bilateral Cathodes configurations were  
252 RVS+LBB, RVS+LVS, and RVS. It was speculated that LVS and LBB were captured by  
253 anodal stimulation in Ring Bipolar configuration, and the LVS and LBB capture threshold  
254 was increased and close to that of the RVS threshold. When the LVS capture threshold was  
255 higher than that of RVS and LBB, it changed to RVS+LBB capture mode. When the LBB  
256 capture threshold was higher than that of LVS and RVS, it changed to RVS+LVS capture  
257 mode. When the RVS capture threshold was lowest, it changed to a select RVS capture while  
258 further reducing the pacing output. In Bilateral cathodal configuration, the RVS, LVS, and  
259 LBB thresholds were also similar as they were all stimulated by the cathode. Thus, similar  
260 capture modes can be observed in Ring Bipolar configuration. On the contrary, RVS was  
261 captured by anodal stimulation in Tip Bipolar configuration, so the threshold was further  
262 increased and was much higher than that of LVS and LBB. This explained why only the  
263 LVS+LBB capture mode exists in Tip Bipolar configuration.

264 ***P-QRS | V6 RWPT | V1 RWPT of full fusion mode.***

265 The present study compared the P-QRS, V6 RWPT, and V1 RWPT of seven capture modes.  
266 Full fusion mode had the shortest P-QRS, V6 RWPT, and V1 RWPT. The P-QRS duration of  
267 full fusion mode was compared to LB-QRS duration in patients with a native narrow or wide  
268 QRS. The results showed that the full fusion mode can achieve a short P-QRS in patients  
269 with a native wide QRS. Full fusion mode significantly improved interventricular  
270 dyssynchrony and RV depolarization durations compared to other capture modes in LBBP.  
271 Although, we also found there was a finding about bilateral bundle branch area pacing has  
272 been reported,<sup>20</sup> which was similar to full fusion mode. But the LBB capture criteria was used  
273 in that study can not precisely confirm LBB capture as the direct evidence of LBB capture  
274 had not been reported at that time. The average V6 RWPT was about 82-84 ms in the study of  
275 bilateral bundle branch area pacing, which was longer than it was reported in our study  
276 (65-68 ms) and other study recently (64-69 ms)<sup>21</sup>, it indicated there may had patients only  
277 capture LVS and without LBB capture. Full fusion mode was recognized by dynamic ECG  
278 and EGM maneuvers which can precisely confirm capture myocardial components in our  
279 study. So full fusion mode should be different from bilateral bundle branch area pacing.

280 ***Clinical implications***

281 The capture threshold is high in conventional bipolar pacing mode in order to achieve full  
282 fusion mode. The present study showed that changing the bilateral electrode pacing vector  
283 configuration can reduce the full fusion mode capture threshold, especially in Bilateral  
284 Cathode and Ring Bipolar configurations. The CRT device already has multiple electrode  
285 pacing vector configurations. If this function can be applied in a normal pacemaker device,

286 more patients can benefit from full fusion mode as it can achieve a more physiological  
287 ventricular depolarization than conventional LBBP can.

## 288 **Limitations**

289 Although it was demonstrated that changing the bilateral electrode pacing vector  
290 configuration can reduce the full fusion mode capture threshold, whether it can be used in a  
291 clinical setting remains unknown. The seven capture mode thresholds in three bilateral  
292 electrode pacing vector configurations were acute pacing parameters, long-term follow-up  
293 was necessary to confirm the threshold stable. Pacemaker manufacturers might need to make  
294 technical improvements to accommodate this technique. In addition, full fusion mode is a  
295 physiological pacing mode based on cardiac electrophysiological data. Whether it will result  
296 in a better hemodynamic response or less mechanical dyssynchrony in a clinical setting  
297 remains a question to be addressed. Clinical trials are necessary to further investigate the  
298 efficacy of this method. Changes in the LB lead EGM can help to distinguish RVS+LBB  
299 capture mode from full fusion mode since paced ECG morphology results were similar. There  
300 may be some difficulty in designating separate EGM in a few patients in Bilateral Cathodal  
301 mode as the EGM amplitude was low and may cause some deviation. Finally, the present  
302 study was performed at a single center and had a small sample size, which may cause bias in  
303 the statistical results.

## 304 **Conclusion**

305 The present study showed that changing the bilateral electrode pacing vector configuration to  
306 Bilateral Cathodes and Ring Bipolar configurations can reduce the full fusion mode capture  
307 threshold compared to conventional bipolar pacing. There were seven capture modes in Ring

308 Bipolar and Bilateral Cathodes during threshold testing, including full fusion mode  
309 (RVS+LVSP+LBB), semi fusion mode (LVS+LBB, RVS+LBB, and RVS+LVS), and select  
310 capture mode (LBB, LVS, and RVS). The full fusion mode had the shortest P-QRS, V6  
311 RWPT, and V1 RWPT, which was a more physiological pacing mode than conventional  
312 LBBP.

### 313 **References**

- 314 1. Sweeney MO, Hellkamp AS, Ellenbogen KA, Greenspon AJ, Freedman RA, Lee KL, et  
315 al. Adverse effect of ventricular pacing on heart failure and atrial fibrillation among  
316 patients with normal baseline QRS duration in a clinical trial of pacemaker therapy for  
317 sinus node dysfunction. *Circulation* 2003 Jun 17;107(23):2932–7. doi:  
318 10.1161/01.CIR.0000072769.17295.B1. Epub 2003 Jun 2. PMID: 12782566.
- 319 2. Nielsen JC, Kristensen L, Andersen HR, Mortensen PT, Pedersen OL, Pedersen AK. A  
320 randomized comparison of atrial and dual-chamber pacing in 177 consecutive patients  
321 with sick sinus syndrome: echocardiographic and clinical outcome. *J Am Coll Cardiol*  
322 2003 Aug 20;42(4):614–23. doi: 10.1016/s0735-1097(03)00757-5. PMID: 12932590.
- 323 3. Lustgarten DL, Crespo EM, Arkhipova-Jenkins I, Lobel R, Winget J, Koehler J, et al.  
324 His-bundle pacing versus biventricular pacing in cardiac resynchronization therapy  
325 patients: a crossover design comparison. *Heart Rhythm* 2015 Jul;12(7):1548–57. doi:  
326 10.1016/j.hrthm.2015.03.048. Epub 2015 Mar 28. PMID: 25828601.
- 327 4. Huang W, Su L, Wu S, Xu L, Xiao F, Zhou X, et al. Long-term outcomes of His bundle  
328 pacing in patients with heart failure with left bundle branch block. *Heart* 2019

- 329 Jan;105(2):137–43. doi: 10.1136/heartjnl-2018-313415. Epub 2018 Aug 9. PMID:  
330 30093543.
- 331 5. Subzposh FA, Vijayaraman P. Long-term results of his bundle pacing. *Card*  
332 *Electrophysiol Clin* 2018 Sep;10(3):537–42. doi: 10.1016/j.ccep.2018.05.011. Epub 2018  
333 Jul 21. PMID: 30172290.
- 334 6. Barba-Pichardo R, Moriña-Vázquez P, Fernández-Gómez JM, Venegas-Gamero J,  
335 Herrera-Carranza M. Permanent His-bundle pacing: seeking physiological ventricular  
336 pacing. *Europace* 2010 Apr;12(4):527–33. doi: 10.1093/europace/euq038. PMID:  
337 20338988.
- 338 7. Huang W, Su L, Wu S, Xu L, Xiao F, Zhou X, et al. A novel pacing strategy with low and  
339 stable output: pacing the left bundle branch immediately beyond the conduction block.  
340 *Can J Cardiol* 2017 Dec;33(12):1736.e1–e3. doi: 10.1016/j.cjca.2017.09.013. Epub 2017  
341 Sep 22. PMID: 29173611.
- 342 8. Vijayaraman P, Subzposh FA, Naperkowski A, Panikkath R, John K, Mascarenhas V, et al.  
343 Prospective evaluation of feasibility and electrophysiologic and echocardiographic  
344 characteristics of left bundle branch area pacing. *Heart Rhythm* 2019 Dec;16(12):1774–  
345 82. doi: 10.1016/j.hrthm.2019.05.011. Epub 2019 May 25. PMID: 31136869.
- 346 9. Chen K, Li Y, Dai Y, Sun Q, Luo B, Li C, et al. Comparison of electrocardiogram  
347 characteristics and pacing parameters between left bundle branch pacing and right  
348 ventricular pacing in patients receiving pacemaker therapy. *Europace* 2019 Apr  
349 1;21(4):673–80. doi: 10.1093/europace/euy252. PMID: 30462207.



- 350 10. Su L, Wang S, Wu S, Xu L, Huang Z, Chen X, et al. Long-term safety and feasibility of  
351 left bundle branch pacing in a large single-center study. *Circ Arrhythm Electrophysiol*  
352 2021 Feb;14(2):e009261. doi: 10.1161/CIRCEP.120.009261. Epub 2021 Jan 9. PMID:  
353 33426907.
- 354 11. Curila K, Jurak P, Jastrzebski M, Prinzen F, Waldauf P, Halamek J, et al. Left bundle  
355 branch pacing compared to left ventricular septal myocardial pacing increases  
356 interventricular dyssynchrony but accelerates left ventricular lateral wall depolarization.  
357 *Heart Rhythm* 2021 Aug;18(8):1281–9. doi: 10.1016/j.hrthm.2021.04.025. Epub 2021  
358 Apr 28. PMID: 33930549.
- 359 12. Wu H, Jiang L, Shen J, Zhang L, Zhong J, Zhuo S. Electrophysiological characteristics  
360 and possible mechanism of bipolar pacing in left bundle branch pacing. *Heart Rhythm*  
361 2022 Dec;19(12):2019–26. doi: 10.1016/j.hrthm.2022.06.022. Epub 2022 Jun 17. PMID:  
362 35718314.
- 363 13. Curila K, Jurak P, Prinzen F, Jastrzebski M, Waldauf P, Halamek J, et al. Bipolar anodal  
364 septal pacing with direct LBB capture preserves physiological ventricular activation  
365 better than unipolar left bundle branch pacing. *Front Cardiovasc Med* 2023 Mar  
366 22;10:1140988. doi: 10.3389/fcvm.2023.1140988. PMID: 37034324; PMCID:  
367 PMC10073552.
- 368 14. Shen J, Jiang L, Cai X, Wu H, Pan L. Left bundle branch pacing guided by continuous  
369 pacing technique that can monitor electrocardiograms and electrograms in real time: a  
370 technical report. *Can J Cardiol* 2022 Aug;38(8):1315–7. doi: 10.1016/j.cjca.2022.03.003.  
371 Epub 2022 Mar 9. PMID: 35276280.

- 372 15. Wu H, Jiang L, Shen J. Recording an isoelectric interval as an endpoint of left bundle  
373 branch pacing with continuous paced intracardiac electrogram monitoring. *Kardiol Pol*  
374 2022;80(6):664–71. doi: 10.33963/KP.a2022.0094. Epub 2022 Apr 5. PMID: 35380007.
- 375 16. Shen J, Jiang L, Wu H, Li H, Zhang L, Zhong J, et al. High-pass filter settings and the  
376 role and mechanism of discrete ventricular electrograms in left bundle branch pacing.  
377 *Front Cardiovasc Med* 2023 Jan 11;9:1059172. doi: 10.3389/fcvm.2022.1059172. PMID:  
378 36712234; PMCID: PMC9874000.
- 379 17. Lloyd MS, Heeke S, Lerakis S, Langberg JJ. Reverse polarity pacing: the hemodynamic  
380 benefit of anodal currents at lead tips for cardiac resynchronization therapy. *J Cardiovasc*  
381 *Electrophysiol* 2007 Nov;18(11):1167–71. doi: 10.1111/j.1540-8167.2007.00943.x. PMID:  
382 17764446.
- 383 18. Ranjan R, Chiamvimonvat N, Thakor NV, Tomaselli GF, Marban E. Mechanism of anode  
384 break stimulation in the heart. *Biophys J* 1998 Apr;74(4):1850–63. doi:  
385 10.1016/S0006-3495(98)77895-6. PMID: 9545047; PMCID: PMC1299529.
- 386 19. Roth BJ, Wikswo JP Jr. Electrical stimulation of cardiac tissue: a bidomain model with  
387 active membrane properties. *IEEE Trans Biomed Eng* 1994 Mar;41(3):232–40. doi:  
388 10.1109/10.284941. PMID: 8045575.
- 389 20. Lin J, Chen K, Dai Y, Sun Q, Li Y, Jiang Y, Zhou Y, Chen R, Jin Y, Yan L, Zhou X, Cheng  
390 A, Zhang X, Gold MR, Zhang S. Bilateral Bundle Branch Area Pacing to Achieve  
391 Physiological Conduction System Activation. *Circ Arrhythm Electrophysiol*. 2020  
392 Aug;13(8):e008267. doi: 10.1161/CIRCEP.119.008267. Epub 2020 Jul 23. PMID:  
393 32701363.

394 21. Chen K, Liu X, Hou X, Qiu Y, Lin J, Dai Y, Xu Y, Jiang L, Zhou X, Zhang X, Lu H, Mara  
395 N, Demmer W, Cheng A, Zou J. Computed tomography imaging-identified location and  
396 electrocardiographic characteristics of left bundle branch area pacing in bradycardia  
397 patients. *J Cardiovasc Electrophysiol.* 2022 Jun;33(6):1244-1254. doi: 10.1111/jce.15493.  
398 Epub 2022 Apr 30. PMID: 35419908.

399

400

401

402

403

404

405

406

407

408

409

410

411

412

413

414

415

416 **Table 1** Patient characteristics (n = 57)

---

|                                               |              |
|-----------------------------------------------|--------------|
| Age (years)                                   | 71.3 ± 10.1  |
| Male gender                                   | 28 (49.1%)   |
| Pacing indication (n)                         |              |
| Sick sinus syndrome                           | 14 (24.6%)   |
| Atrioventricular block                        | 42 (73.7%)   |
| Heart failure                                 | 1 (1.7%)     |
| Comorbidities (n)                             |              |
| Diabetes mellitus                             | 20 (35.1%)   |
| Hypertension                                  | 33 (57.9%)   |
| Atrial fibrillation                           | 14 (24.6%)   |
| Cardiomyopathy                                | 3 (5.3%)     |
| Coronary heart disease                        | 8 (14.0%)    |
| Heart failure                                 | 8 (14.0%)    |
| Left ventricular ejection fraction (%)        | 62.1 ± 11.1  |
| Left ventricular end-diastolic dimension (mm) | 49.1 ± 5.9   |
| Native QRS type                               |              |
| Narrow                                        | 40 (70.1%)   |
| RBBB                                          | 12 (21.1%)   |
| LBBB                                          | 5 (8.8%)     |
| Native QRS duration (ms)                      | 103.8 ± 25.2 |

---

417

418 Abbreviations: LBBB, left bundle branch block; RBBB, right bundle branch block.

419

420

421

422

423

424

425

426

427

428

429

430

431

432

433

434

435

436

437

438

439

440 **Table 2** Pacing and procedure-related characteristics (n = 57)

---

|                                                           |               |
|-----------------------------------------------------------|---------------|
| LBB potential observed (n)                                | 39 (68.4%)    |
| LBB potential amplitude (mV)                              | 0.3 ± 0.2     |
| Ventricular sensing (mV, unipolar)                        | 9.9 ± 5.1     |
| Transition to S-LB (n, unipolar)                          | 42 (73.7%)    |
| Transition to LVS (n, unipolar)                           | 15 (26.3%)    |
| S-LB capture threshold (V/0.5ms, unipolar, tip electrode) | 0.5 ± 0.2     |
| LVS capture threshold (V/0.5ms, unipolar, tip electrode)  | 0.6 ± 0.1     |
| RVS capture threshold (V/0.5ms, unipolar, Ring electrode) | 0.9 ± 0.5     |
| V6 RWPT with 2v output (ms, unipolar)                     | 65.5 ± 8.7    |
| V6 RWPT with 8v output (ms, unipolar)                     | 64.4 ± 8.6    |
| Impedance (Ω, unipolar)                                   | 722.0 ± 146.4 |
| Lead depth (mm)                                           | 13.5 ± 3.2    |

---

441

442 Abbreviations: LBB, left bundle branch; S, selective; LB, left bundle; LVS, left ventricular

443 septal; RVS, right ventricular septal; RWPT, R-wave peak time

444

445

446

447

448

449

450

451

452 **Figure legends**

453 **FIGURE 1** Schematic representation of three bilateral electrode pacing vector configurations  
454 and distribution of seven capture modes.

455 “ + ” = anodal; “ - ” = cathodal.

456 The dotted line indicates electric current flow path.

457 **FIGURE 2** A single patient with four capture mode transitions in three bilateral electrode  
458 pacing vector configurations.

459 In Tip Bipolar, the output decreased to 2.0 V, RVS+LVS+LBB transferred to LVS+LBB, LB  
460 lead EGM was separated, and V1 RWPT was prolonged. The output further decreased to 0.4  
461 V, LVS+LBB transferred to LBB, V1 changed to “M” type, V1 RWPT was further prolonged,  
462 LB lead EGM was further separated, and there was an isoelectric interval between pacing  
463 artifact and local ventricular electrogram. In Ring Bipolar, the output decreased to 1.1 V,  
464 RVS+LVS+LBB transferred to RVS+LBB, ECG remained the same, and LB lead EGM was  
465 separated. The output further decreased to 0.9 V and RVS+LBB transferred to LBB. Bilateral  
466 Cathodal transition was similar to that of Ring Bipolar.

467 **FIGURE 3** A single patient with five capture mode transitions in three bilateral electrode  
468 pacing vector configurations.

469 In Tip Bipolar, the output decreased to 2.5 V, RVS+LVS+LBB transferred to LVS+LBB, LB  
470 lead EGM was separated, and V1 RWPT was prolonged. The output further decreased to 1.0  
471 V, LVS+LBB transferred to LVS, LB lead EGM remained similar, and V6 RWPT was  
472 prolonged. In Ring Bipolar, the output decreased to 2.4 V, RVS+LVS+LBB transferred to  
473 RVS+LVS, LB lead EGM remained similar, and V6 RWPT was prolonged. The output

474 further decreased to 1.1 V, RVS+LVS transferred to RVS, LB lead EGM was separated, and  
475 V6 RWPT was further prolonged. Bilateral Cathodal transition was similar to that of Ring  
476 Bipolar.

477 **FIGURE 4** Ventricular sensing, impedance, and seven capture mode thresholds in three  
478 bilateral electrode pacing vector configurations.

479 **FIGURE 5** V6 RWPT, V1 RWPT, and P-QRS in seven capture modes.

480 **FIGURE 6** Comparison of P-QRS of full fusion mode and LB-QRS in intrinsic rhythm in  
481 patients with native narrow and wide QRS after LBBP.

482 **GRAPHICAL ABSTRACT** The characteristics of ECG and EGM of different types of  
483 capture in three bilateral electrode pacing vector configurations and the schematic representation.

484 **SUPPLEMENTARY FIGURE 1** The changes in EGM and ECG during the threshold test of  
485 the three bilateral electrode pacing vector configurations.

486

487

488

489

490

491

492

493

494

495



496 **FIGURE 1**

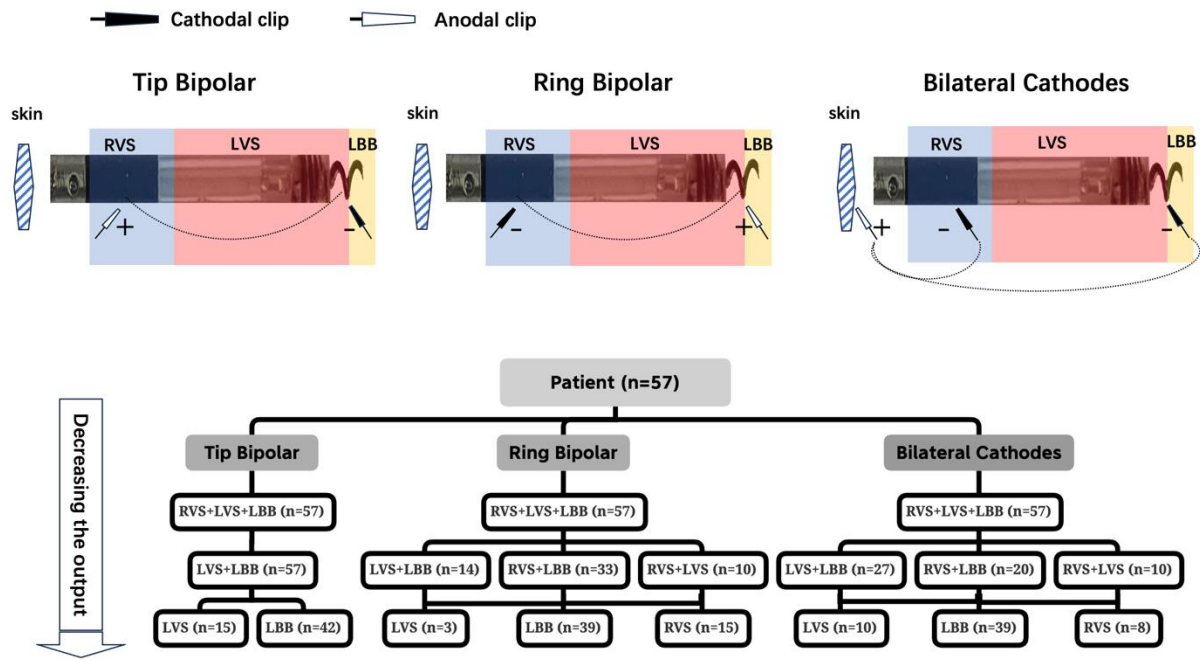

497

498

499

500

501

502

503

504

505

506

507

508

509

510

511 **FIGURE 2**

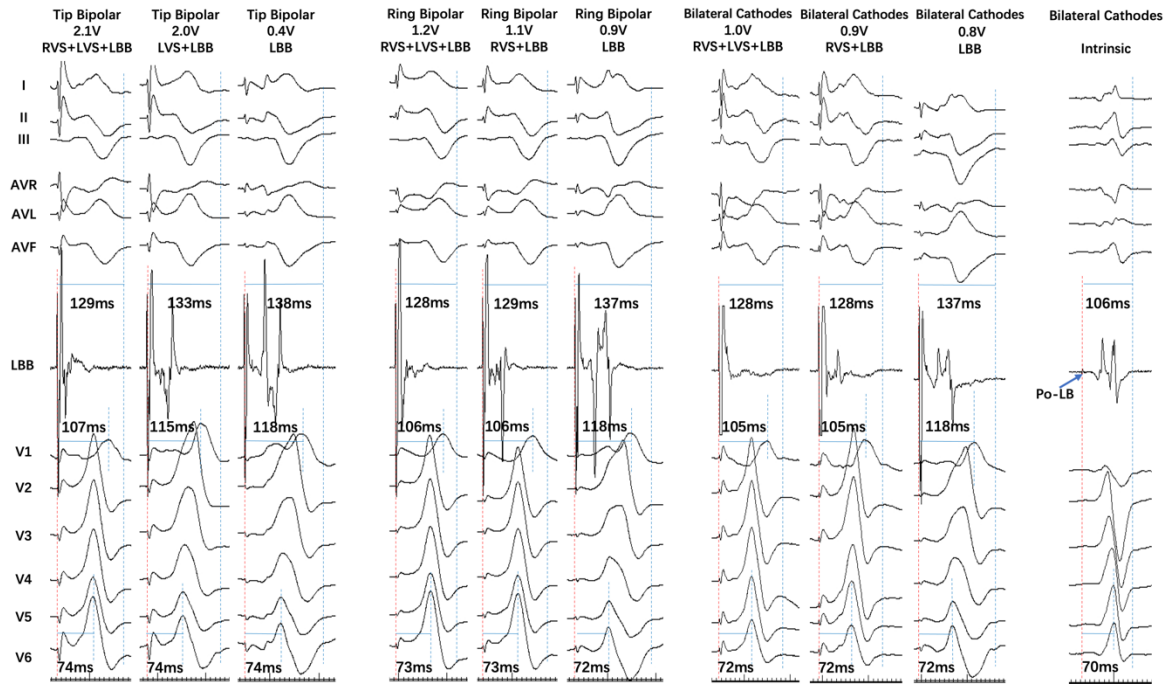

512

513

514

515

516

517

518

519

520

521

522

523

524

525

526 **FIGURE 3**

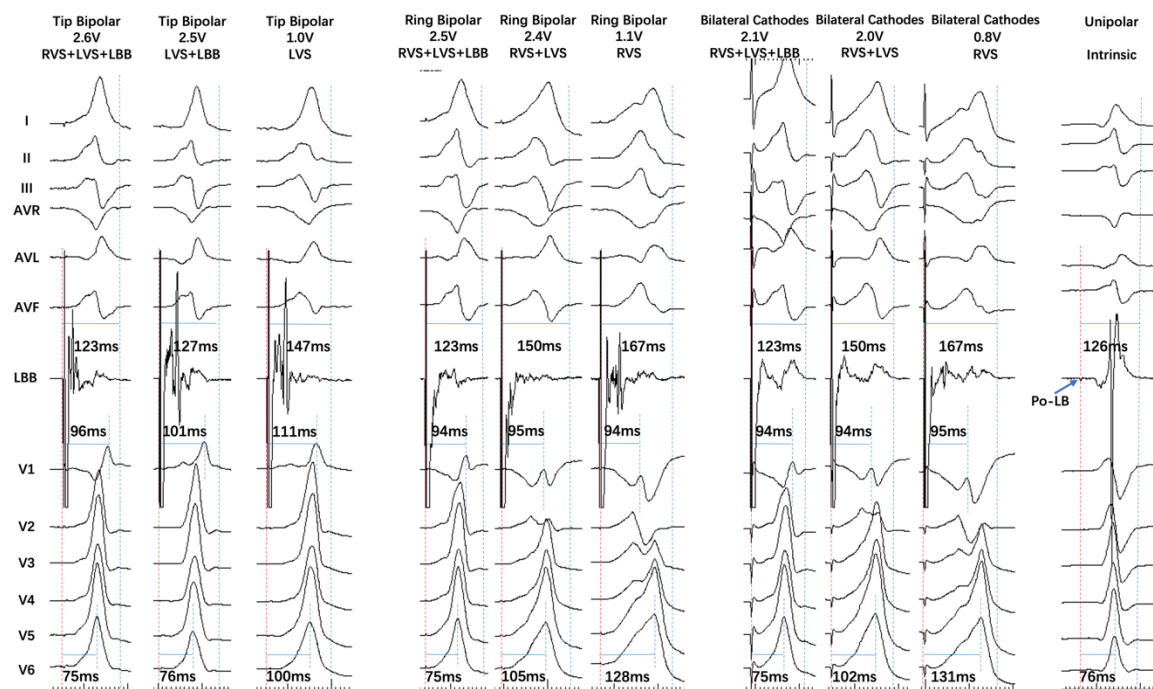

527

528

529

530

531

532

533

534

535

536

537

538

539

540

541 **FIGURE 4**

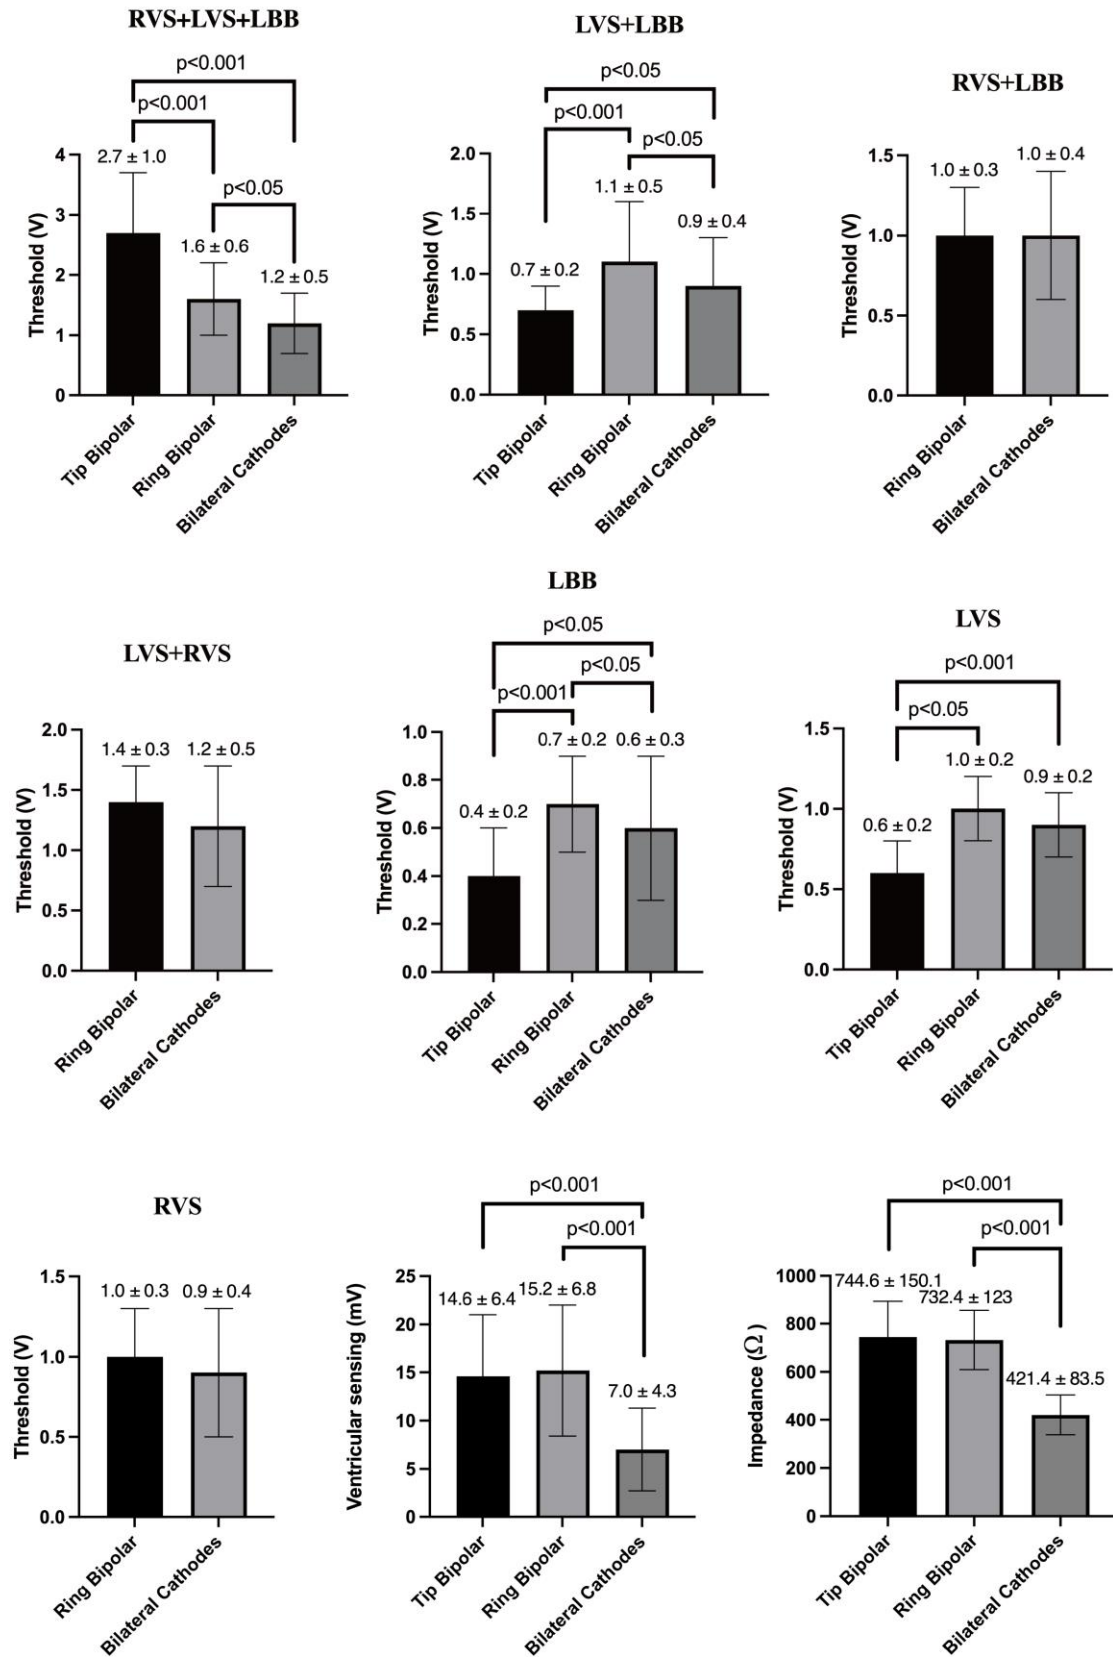

543 **FIGURE 5**

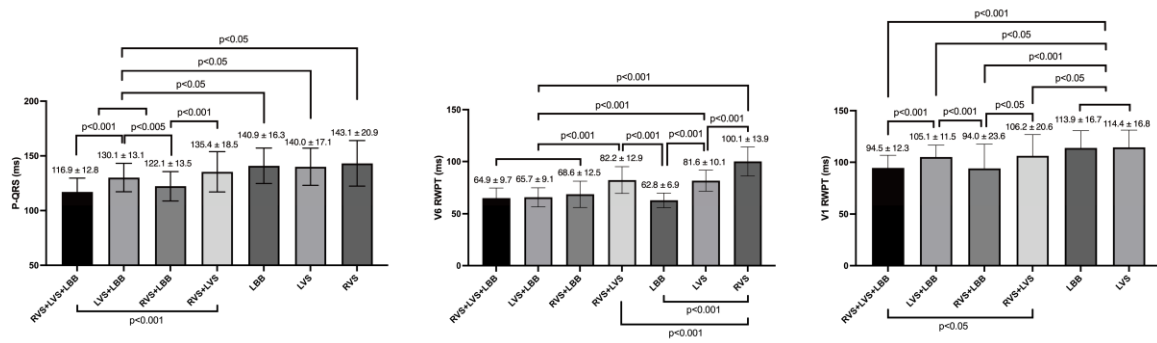

544

545

546

547

548

549

550

551

552

553

554

555

556

557

558

559

560 **FIGURE 6**

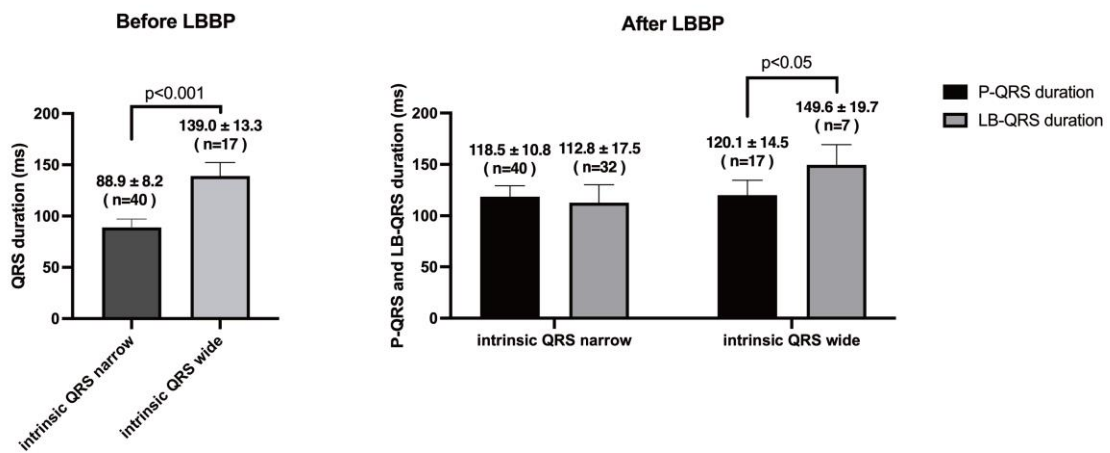

561

562

563

564

565

566

567

568

569

570

571

572

573

574

575 **GRAPHICAL ABSTRACT**

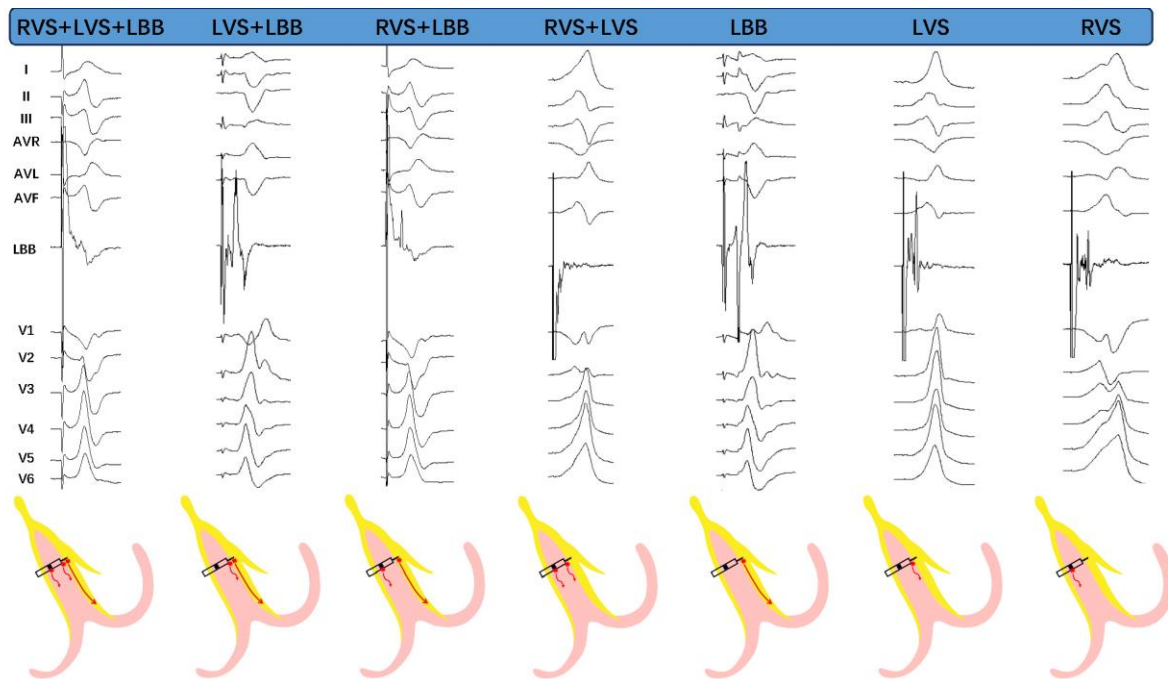

576

**RVS+LVS+LBB**      **LVS+LBB**      **RVS+LBB**      **RVS+LVS**      **LBB**      **LVS**      **RVS**

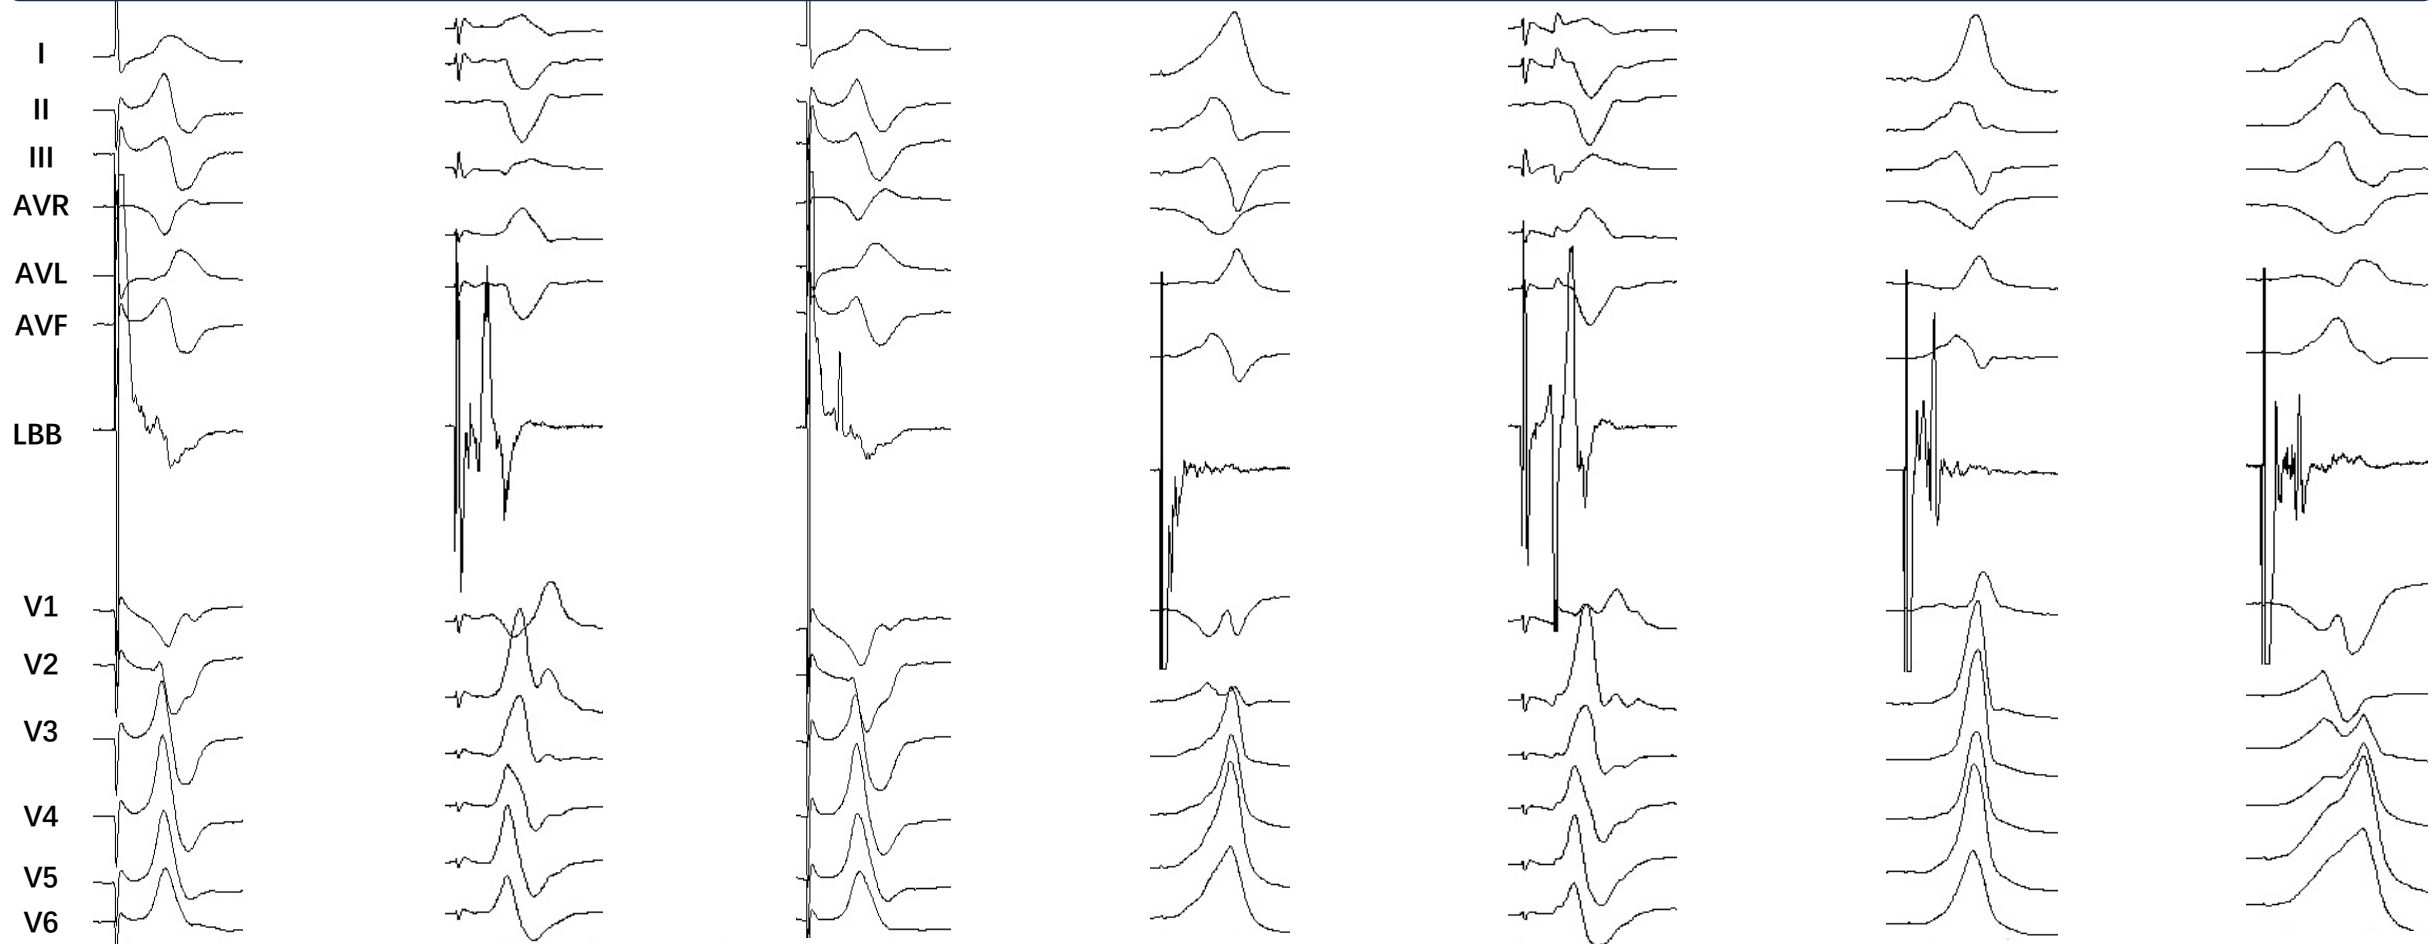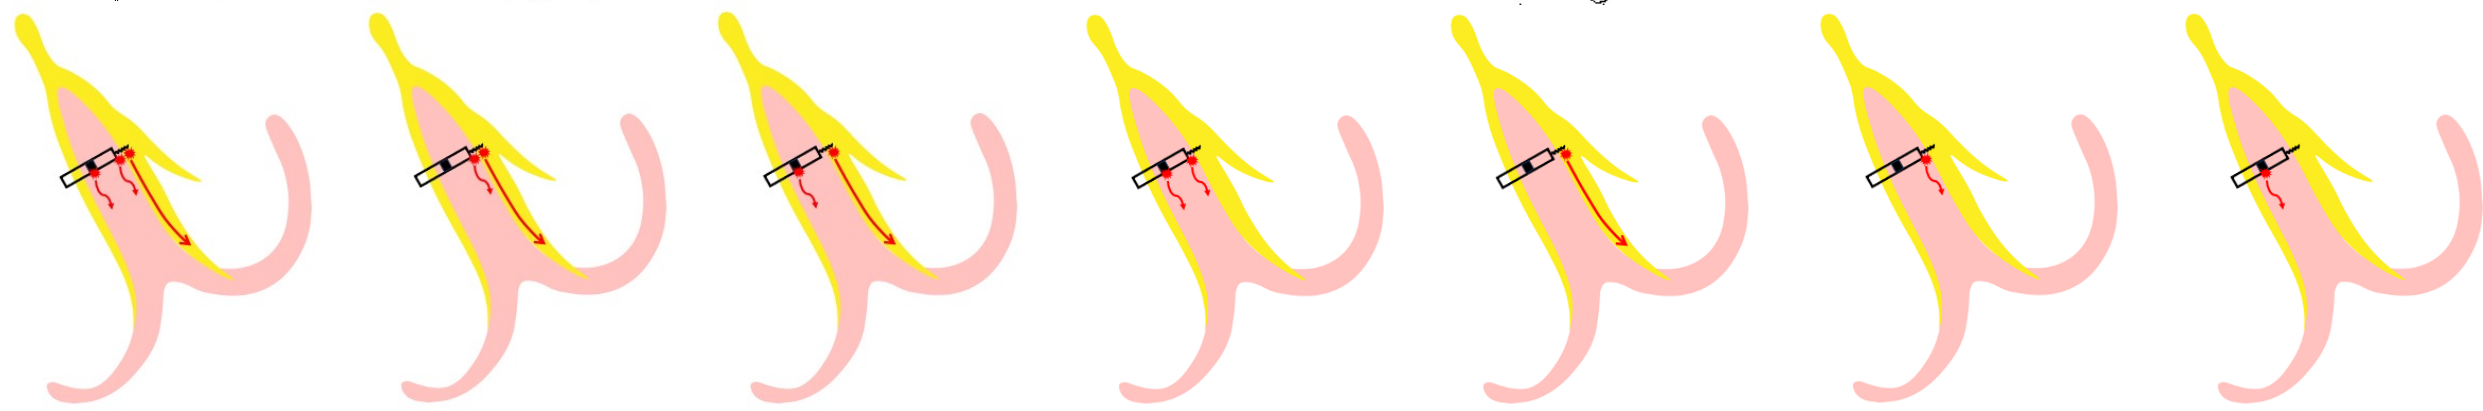

Source: https://medrxiv.org/content/10.1101/2023.12.05.23299529v1.full.pdf
